# Supplementary material
Source: PubMed Central journal article supplement (PMC3482139)
Supplement: NIHMS407982-supplement-2_si_002.pdf [file NIHMS407982-supplement-2_si_002.pdf]

| Figure 3          |                  | Figure 4              |                  | Figure 5      |                  |
|-------------------|------------------|-----------------------|------------------|---------------|------------------|
| Beam current (pA) | Cut-off time (s) | Dwell time ( $\mu$ s) | Cut-off time (s) | Magnification | Cut-off time (s) |
| 7                 | 80               | 2                     | 77               | 80,000x       | 50               |
| 14                | 60               | 5                     | 40               | 100,000x      | 40               |
| 20                | 40               | 10                    | 40               | 120,000x      | 20               |
| 40                | 20               | 15                    | 20               | 150,000x      | 20               |

190x37mm (1000 x 1000 DPI)
