# Supplementary material
Source: PubMed Central journal article supplement (PMC3482139)

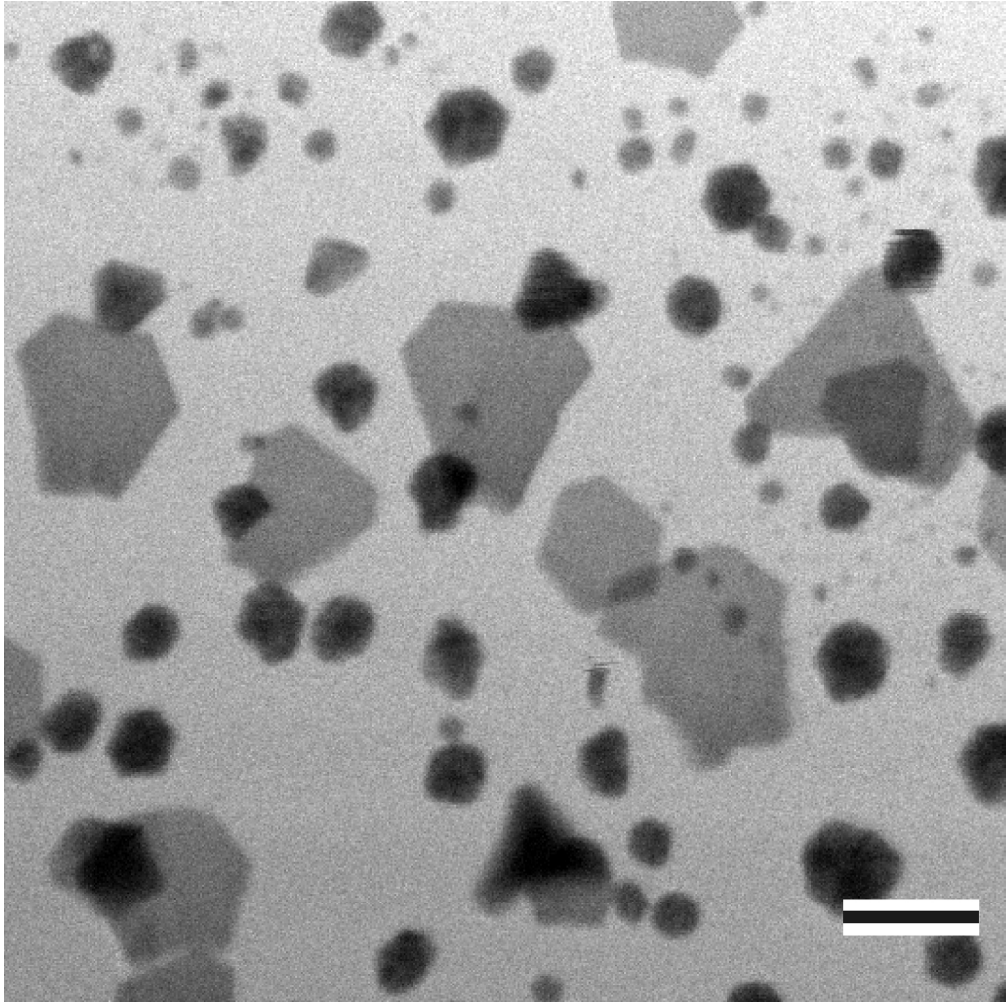

88x88mm (750 x 750 DPI)

Supplement: NIHMS407982-supplement-5_si_005.pdf [file NIHMS407982-supplement-5_si_005.pdf]
